# Supplementary material
Source: PubMed Central journal article supplement (PMC2519544)
Supplement: supp_190_17_5766__1.pdf [file supp_190_17_5766__1.pdf]

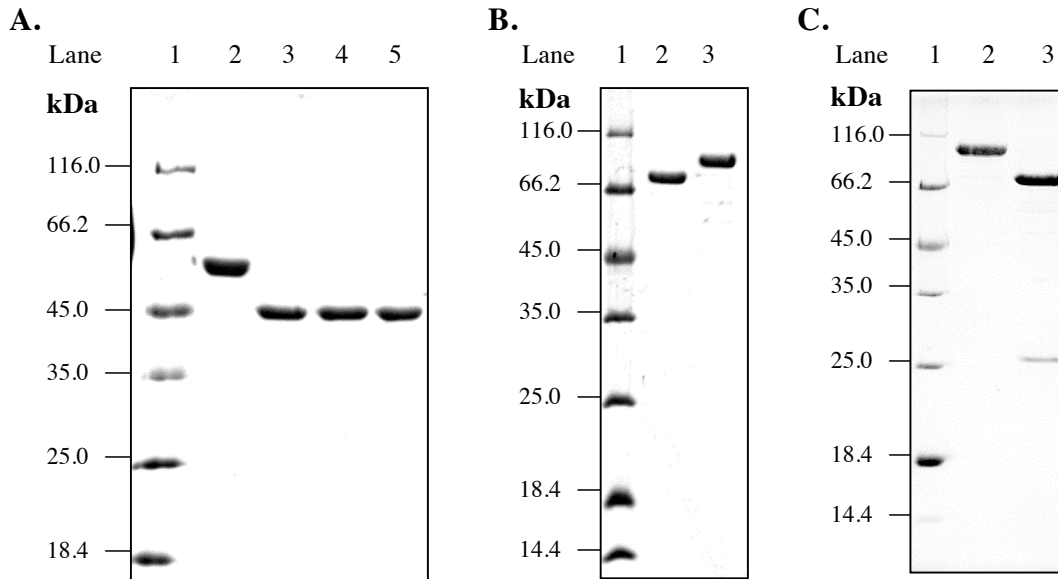

**Supplementary Figure 1.** SDS-PAGE of the purified MacRPA1 wild type and its chimeras. **A.** The lanes 1 to 5 represent 1, Protein molecular weight marker (Fermentas); 2, MacRPA1 wild type; 3, MacRPA1 chimera-1; 4, MacRPA1 chimera-2 (MbuRPA1-like); 5, MacRPA1 chimera-3, respectively. **B.** The lanes 1 to 3 represent: 1, Protein molecular weight marker (Fermentas); 2, MjaRPA-like protein; 3, MthRPA-like protein, respectively. **C.** The lanes 1 to 3 represent: 1, Protein molecular weight marker (Fermentas); 2, MthRPA wild type protein; 3, MthPoBI complex, respectively.
